# Supplementary material for: Designing meso- and macropore architectures in hybrid organic–inorganic membranes by combining surfactant and breath figure templating (BFT)
Source: Royal Society of Chemistry journal article supplement (doi:10.1039/b821506e), 2009-01-01
Supplement: b821506e.pdf [file b821506e.pdf]

## Supporting Information

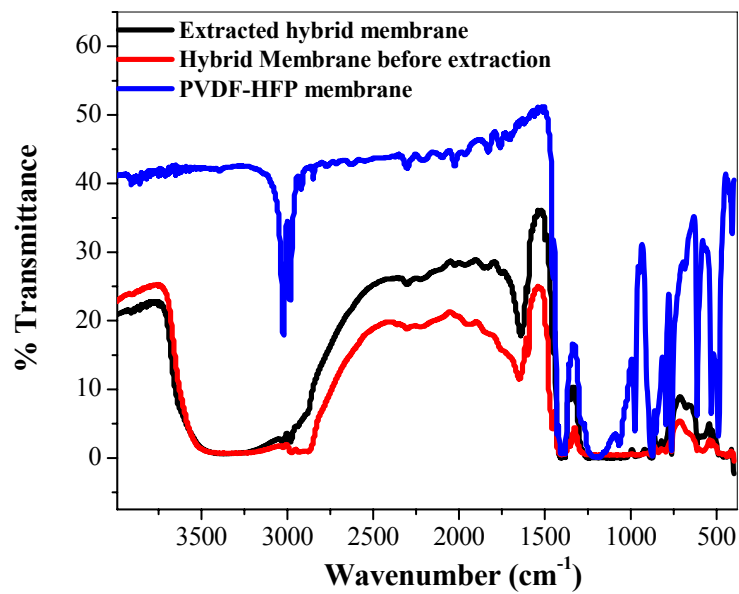

Figure S1. Representative FTIR spectra of hybrid membranes with additional SBA-15-SO<sub>3</sub>H powder (before and after extraction of the surfactant and PVDF-HFP membrane as reference).
